# Supplementary material for: Phosphomolybdic acid immobilized on ionic liquid-modified hexagonal boron nitride for oxidative desulfurization of fuel
Source: Royal Society of Chemistry journal article supplement (doi:10.1039/c7ra10697a), 2017-01-01
Supplement: c7ra10697a1.pdf [file c7ra10697a1.pdf]

## ***Supporting Information***

### ***Phosphomolybdic Acid Immobilized on Ionic Liquid-Modified Hexagonal Boron Nitride for Oxidative Desulfurization of Fuel***

Haiyan Ji<sup>1</sup>, Haitao Ju<sup>1</sup>, Rong Lan<sup>2</sup>, Peiwen Wu<sup>3</sup>, Jia Sun<sup>1</sup>, Yanhong Chao<sup>2</sup>, Suhang Xun<sup>2</sup>,

Wenshuai Zhu<sup>2\*</sup>, Huaming Li<sup>4</sup>

<sup>1</sup>School of Materials Science and Engineering, Jiangsu University, Zhenjiang 212013 (China)

<sup>2</sup>School of Energy and Power Engineering, Jiangsu University, Zhenjiang 212013 (China)

<sup>3</sup>School of Chemistry and Chemical Engineering, Jiangsu University, Zhenjiang 212013 (China)

<sup>4</sup>Institute for Energy Research, Jiangsu University, Zhenjiang 212013 (China)

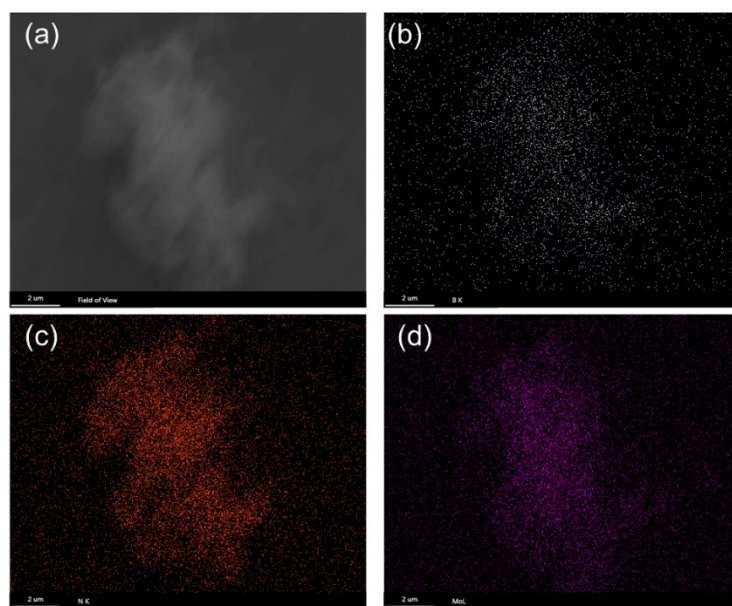

Fig. S1 (a) SEM characterization of HPMo/BN-IL and EDS mapping of (b) B element, (c) N element, and (d) Mo element.
